# Supplementary material for: Dendritic Cell-Targeted pH-Responsive Extracellular Vesicles for Anticancer Vaccination
Source: MDPI journal article supplement (doi:10.3390/pharmaceutics11020054), 2019-01-27
Supplement: s1 [file s1]

# Supplementary Materials: Dendritic Cell-targeted pH-responsive Extracellular Vesicles for Anticancer Vaccination

Hyuk Lee, Hong Suk Park, Hyeon Sup Yu, Kun Na, Kyung Taek Oh and Eun Seong Lee

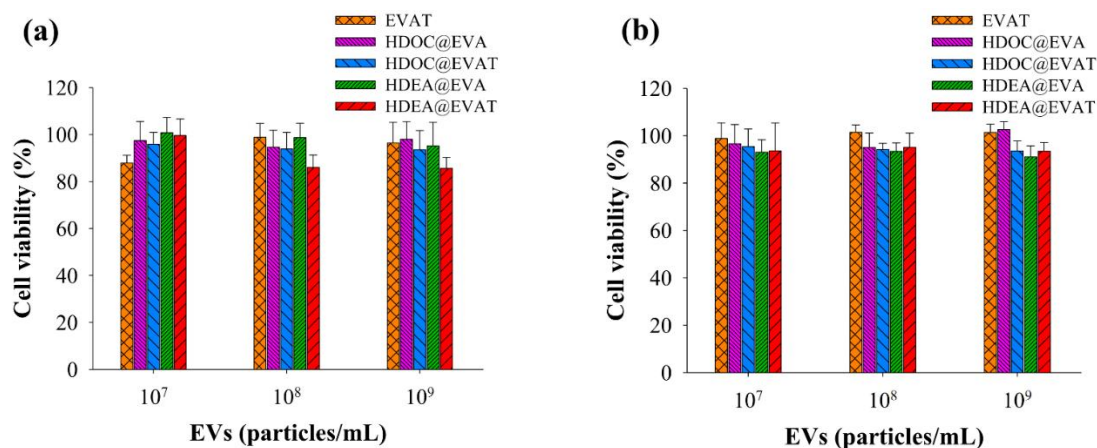

**Figure S1.** Cell viability test of (a) MCF-7 cells or (b) RAW 264.7 cells after 24 h treatment with EVs at 37 °C (n=7).

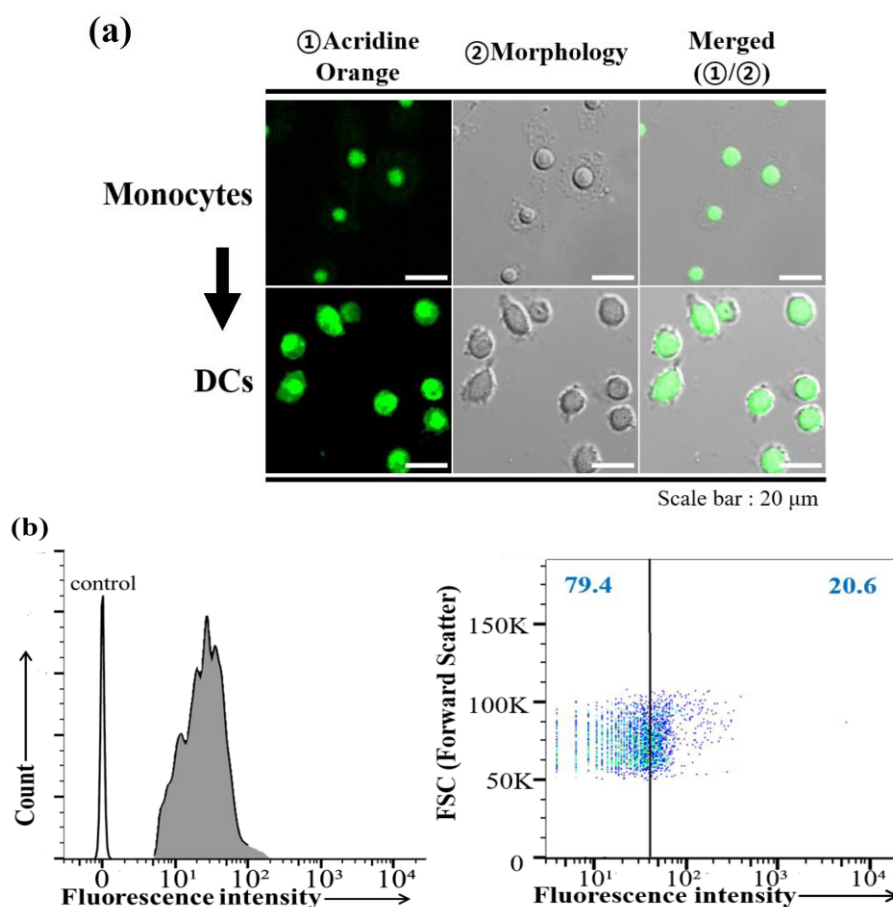

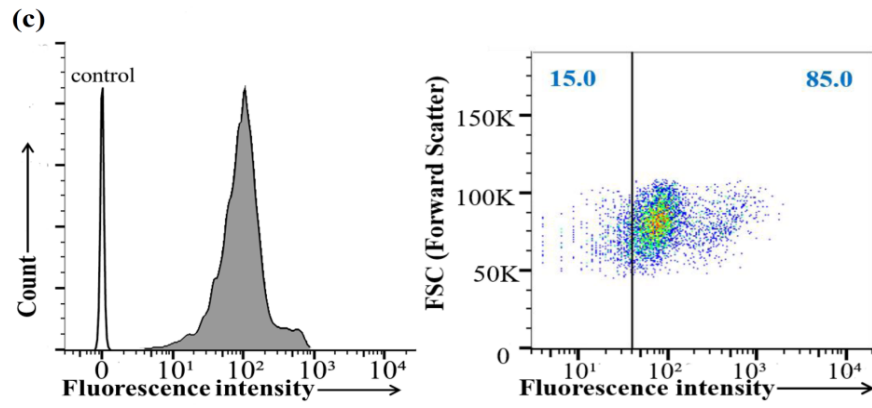

**Figure S2.** (a) Confocal images of monocytes and DCs stained with the acridine orange dye. Monocytes differentiated into DCs by incubating them with GM-CSF and IL-4 for 7 d. Flow cytometry analyses and dot plots of (b) monocytes or (c) DCs treated with FITC-CD86 antibodies.

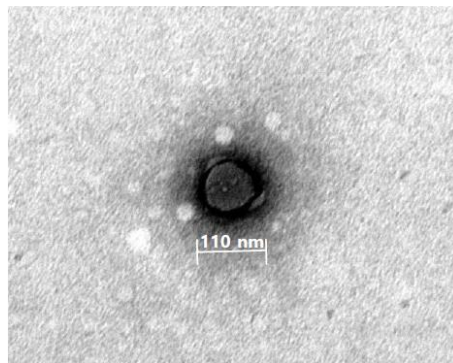

**Figure S3.** Transmission electron microscope (TEM) image of HDEA@EVAT at pH 7.4.
